# Supplementary material for: Unravelling Effects of Anti-aging Drugs on <em>C. elegans</em> using Liposomes
Source: Preprints.org preprint supplement (doi:10.20944/preprints202212.0326.v1), 2022-12-19
Supplement: Supplementary file 1 [file supplementary]

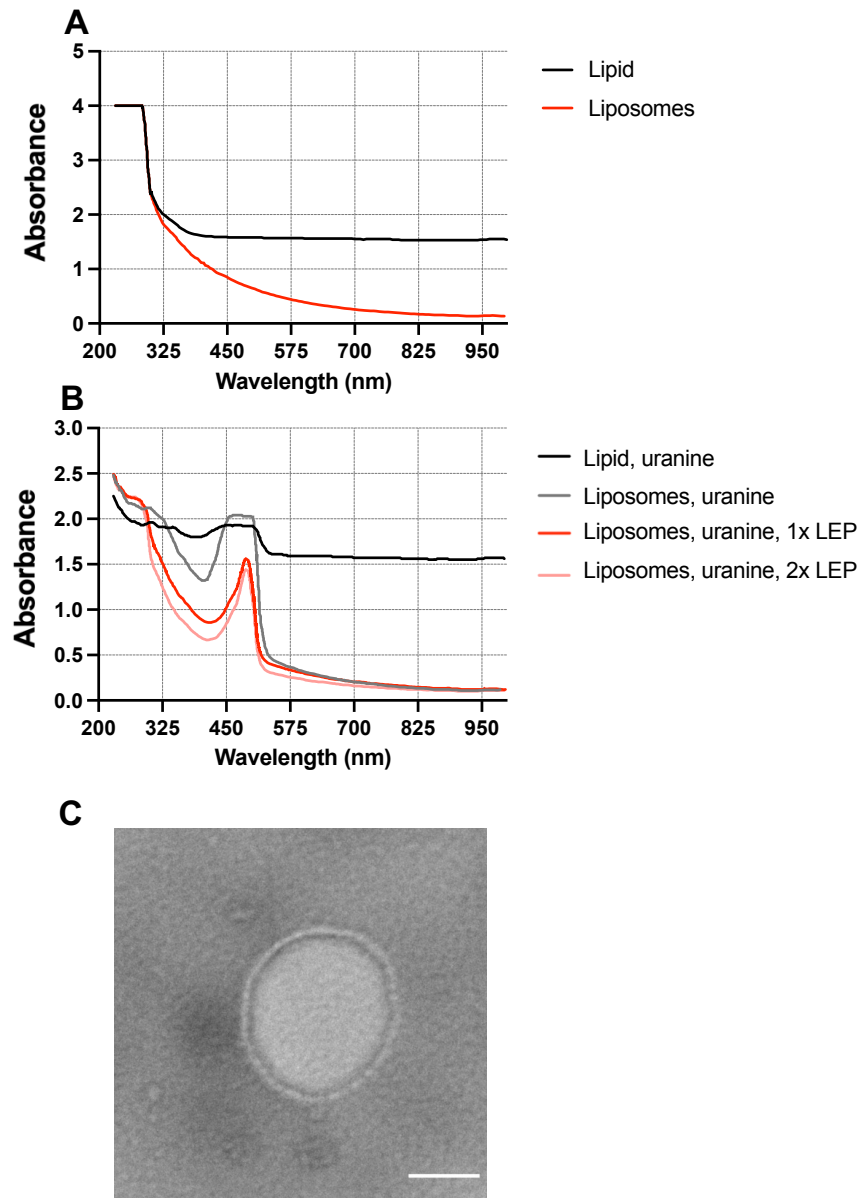

**Figure S1.** Verification of liposome formation. A, clarification of lipid mixture after extrusion. B, use of liposome extruder purification (LEP) to confirm presence of liposomes. C, TEM image of a liposome. Scale bar 100 nm.

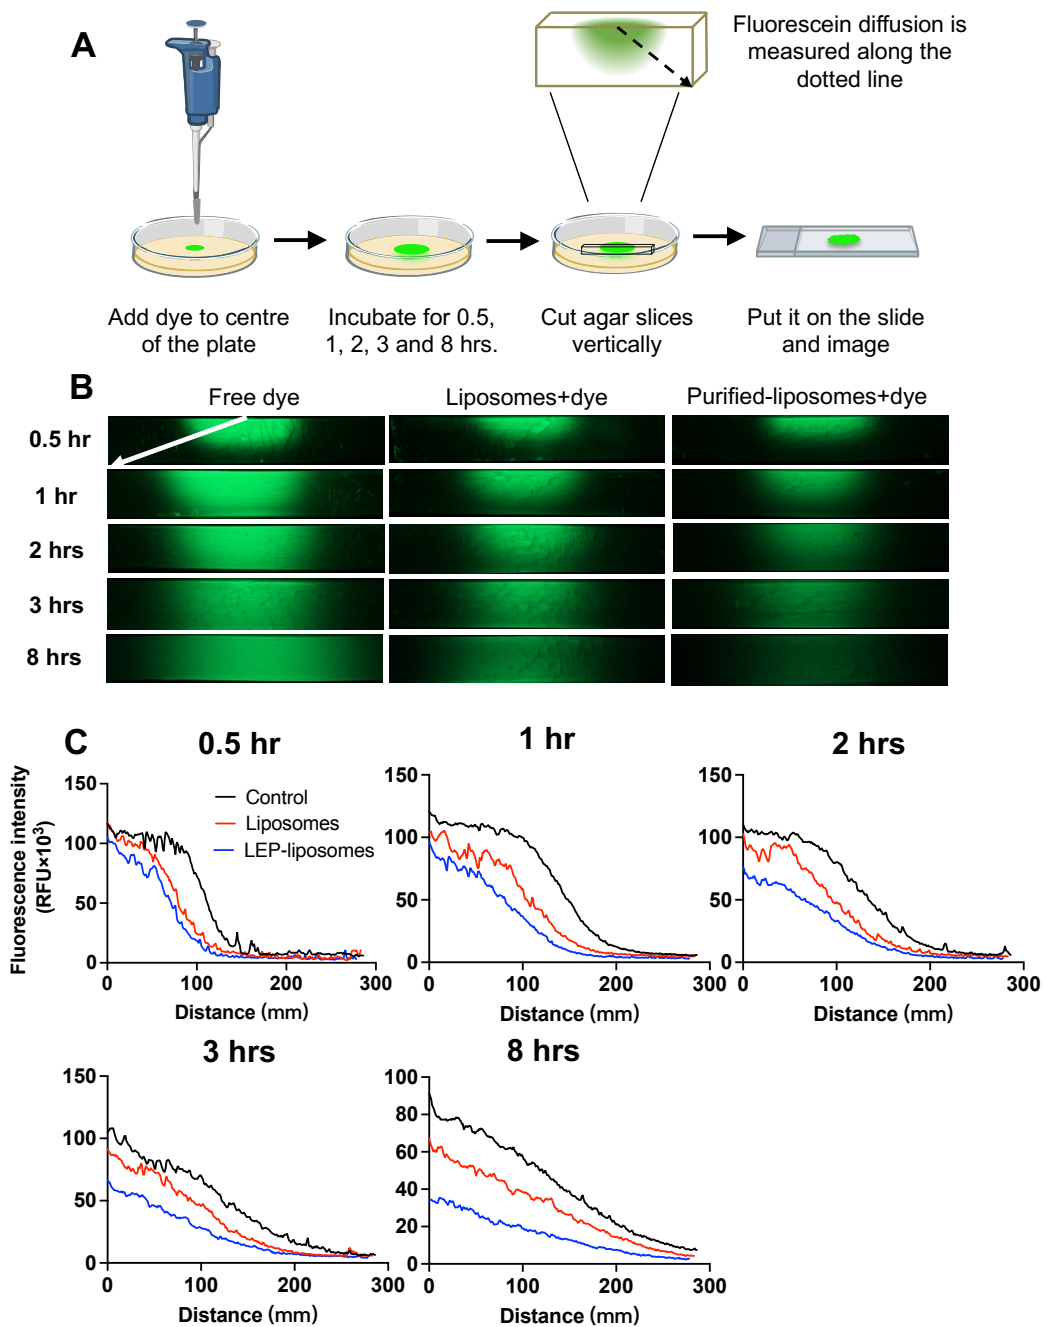

**Figure S2.** Liposome encapsulation leads to dye retention at the plate surface. A, Experimental design. B, Images of green uranine fluorescence in agar slices at intervals after addition of dye to plate surface. C, Quantitation of decline in fluorescence with distance from point of application of dye to plate surface. Liposomes are a suspension of liposomes containing dye in a dye solution. LEP liposomes are purified liposomes, i.e. with dye within the liposomes but not the surrounding buffer. The latter show the least diffusion through the agar.

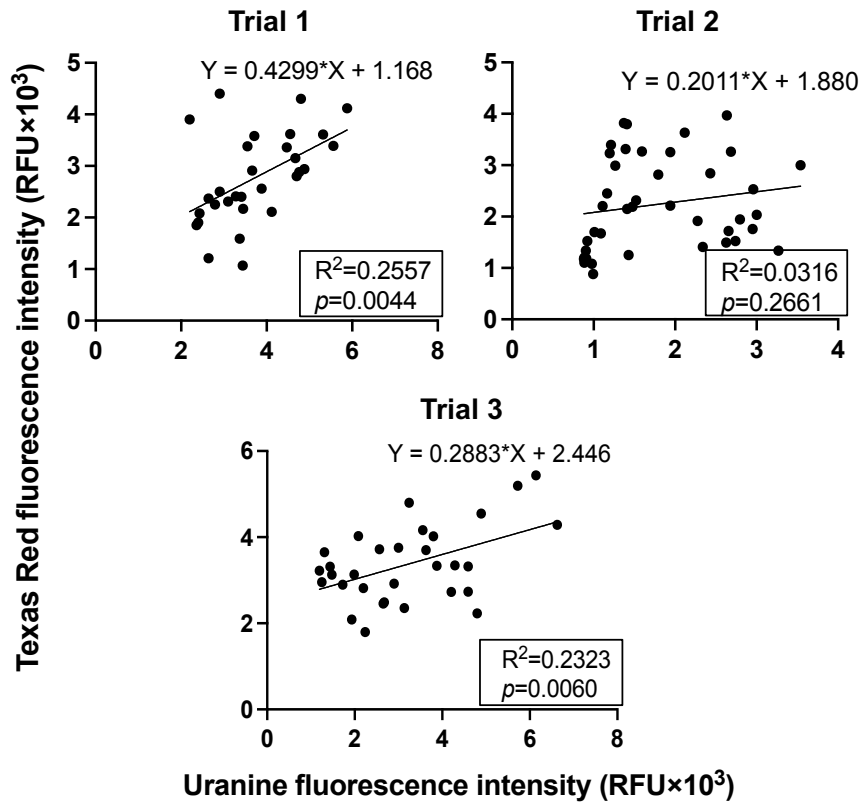

**Figure S3.** Three separate trials of serial exposure of dyes encapsulated in liposomes showing level of dye uptake is not likely due to intrinsic differences between worms. A weak significant positive correlation is seen with  $R^2 > 0.26$  in all trials, suggesting only around 20% of the variation in the data is explained by differences between individual worms.

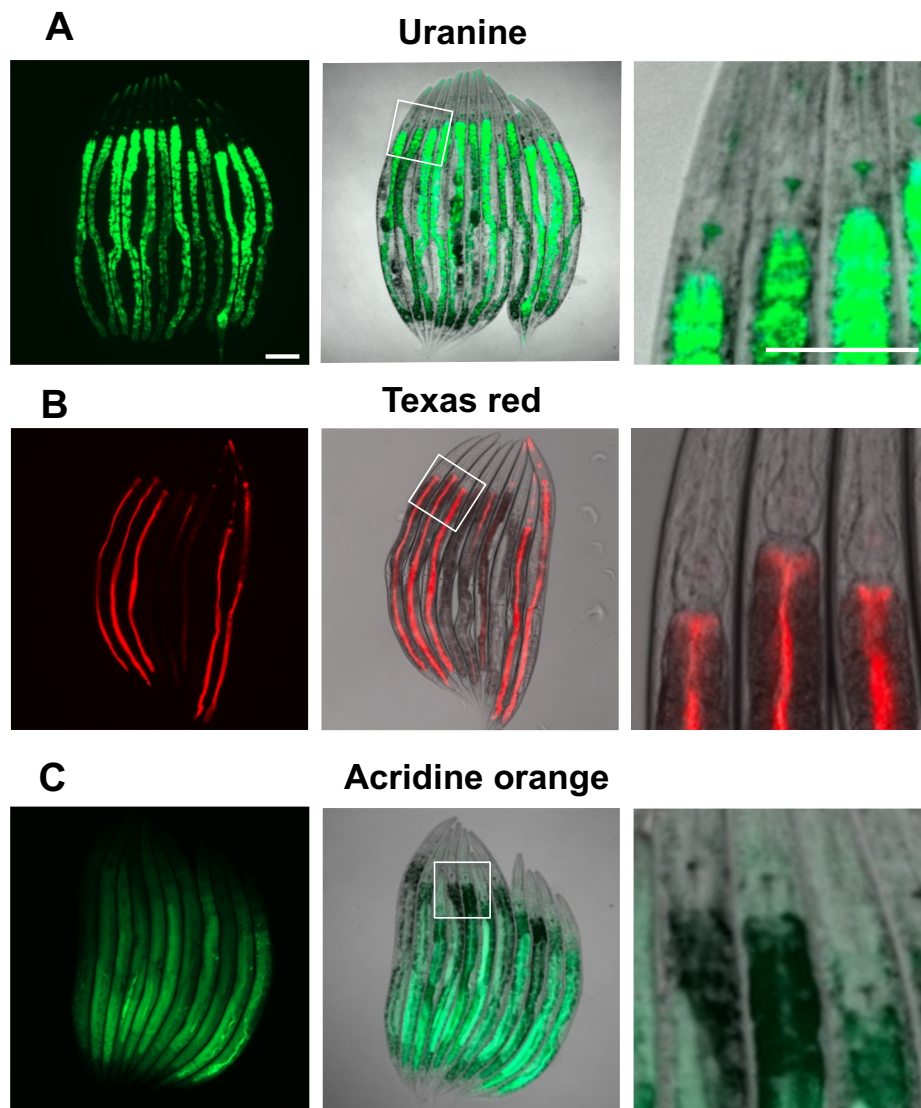

**Figure S4.** Distribution of different dyes in the intestine of wild-type *C. elegans*, zoomed in section shown in box. A, Uranine. B, Texas red. C, Acridine orange. Scale bar 100  $\mu\text{m}$ .

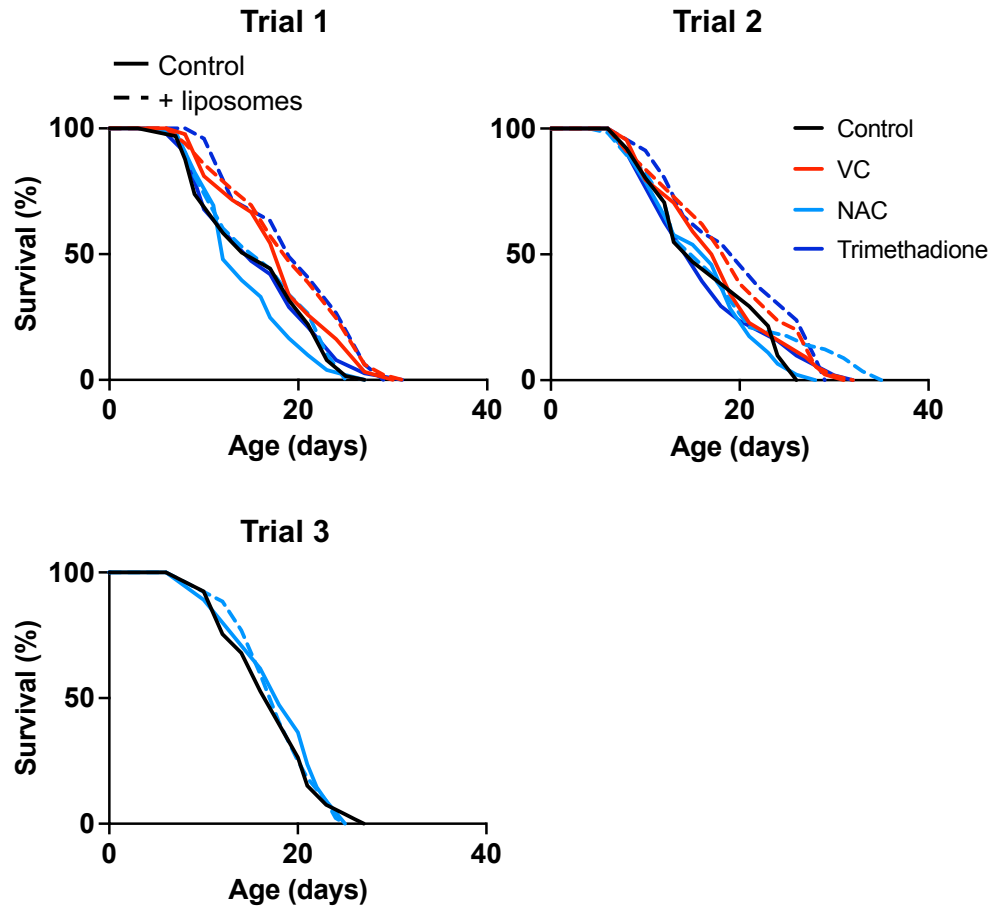

**Figure S5.** Three separate trials of effects of two antioxidants and trimethadione on *C. elegans* lifespan (20°C). NAC ( $N=3$ ) showed largely negative effect on lifespan, VC ( $N=2$ ) showed weak effect in 1/2 trails, and trimethadione ( $N=2$ ) only showed lifespan increase when liposomes were present. For statistical details, see Supplemental Table 1.

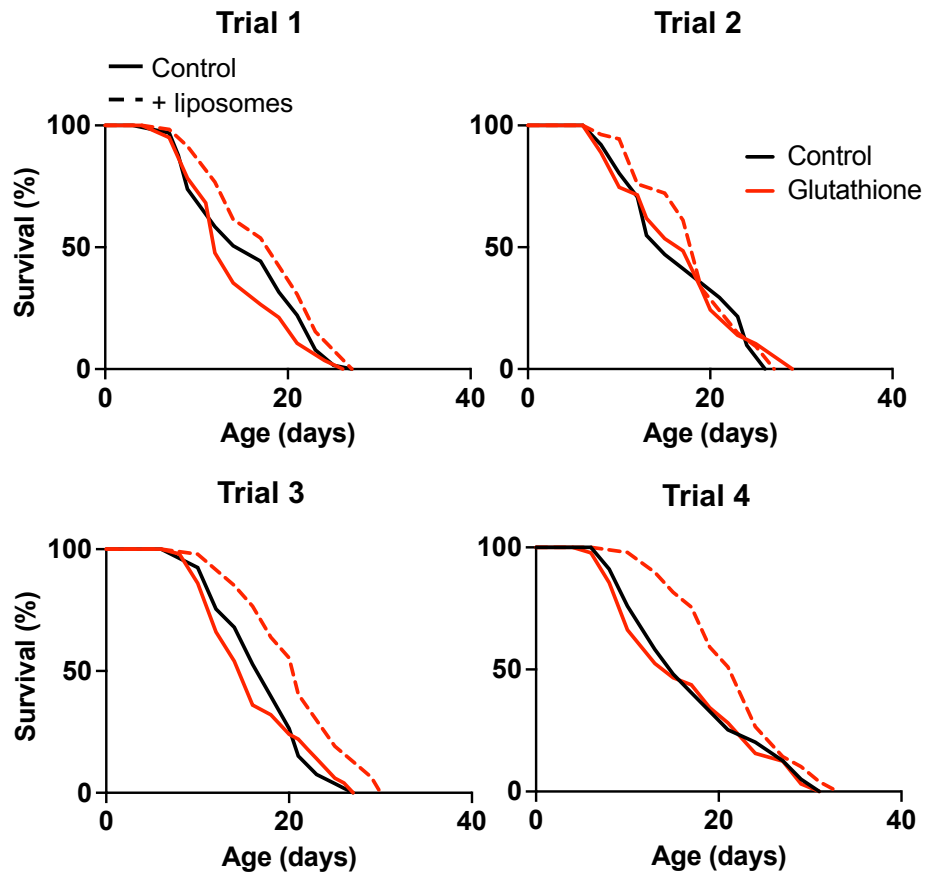

**Figure S6.** Four separate trials of effects of GSH on *C. elegans* lifespan (20°C). GSH showed no lifespan increase in 4/4 trials, but 3/4 showed significant lifespan increase with using liposomes. For statistical details, see Supplemental Table 1.

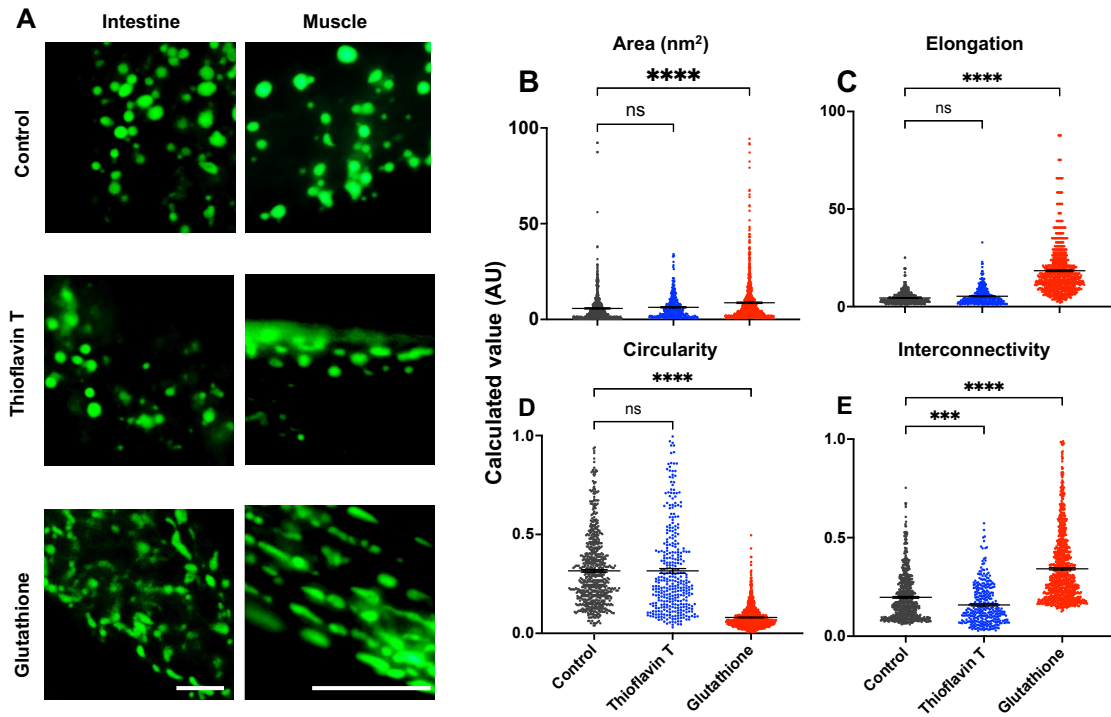

**Figure S7.** Evidence that GSH induces mitochondrial fusion in intestinal cells of *C. elegans* but ThT does not. Images depict mitochondrial morphology in untreated (control) and ThT- or GSH-treated *C. elegans*. A, Mitochondrial morphology in strain SJ4143 *zcls17(Pges -1::GFP<sup>mt</sup>)* (GFP-expressed in mitochondria in intestinal cells). B-E, Intestinal mitochondrial morphology parameters assessed by measuring all mitochondria within the image. Scale bar, 10  $\mu\text{m}$ . \*\*\* $p < 0.001$ , \*\*\*\* $p < 0.0001$ ; one-way ANOVA (Šidák correction).

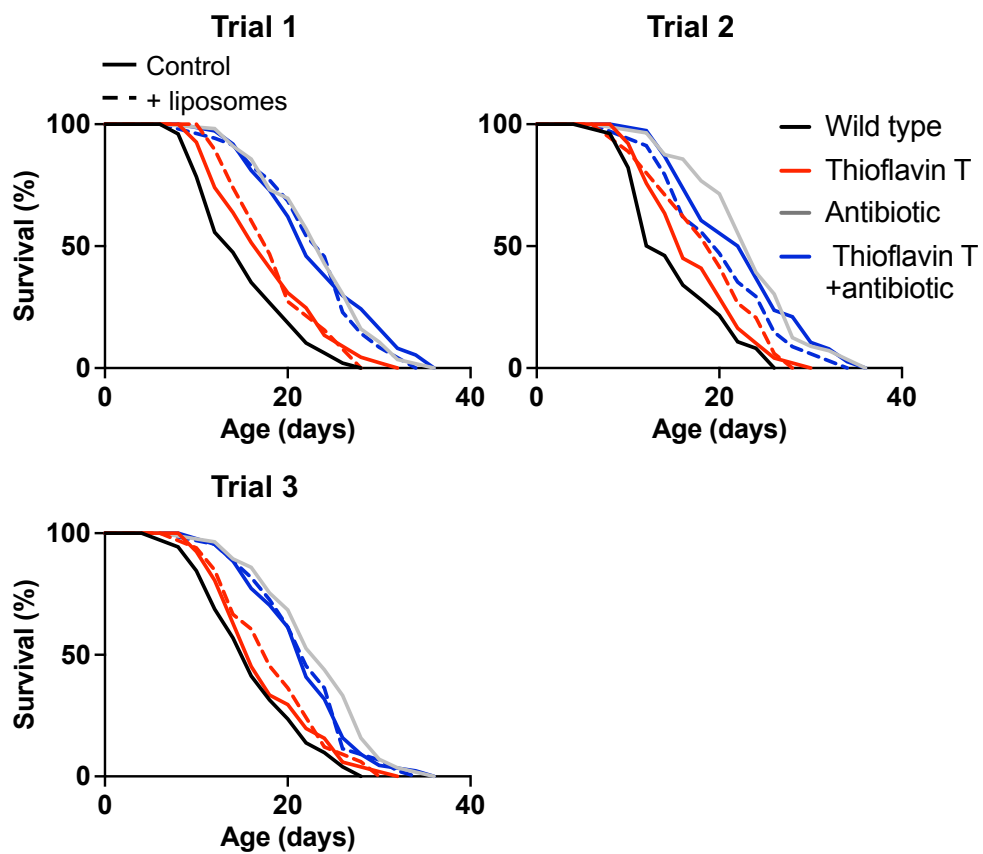

**Figure S8.** Effects of ThT on *C. elegans* lifespan (20°C). ThT significantly increased lifespan in 3/3 trials, but the effect abrogated by carbenicillin. For statistical details, see Supplemental Table 3.

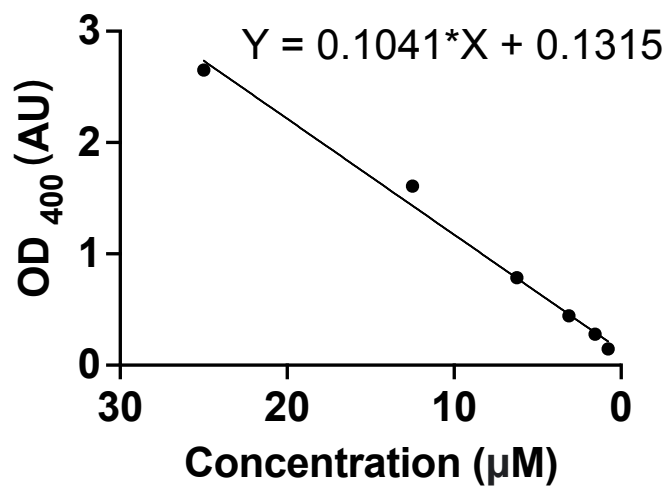

**Figure S9. ThT calibration curve.** 25 µM ThT solution in MilliQ water was diluted 1/2, 1/4, 1/8, 1/16, and 1/32, and the absorbance of each dilution measured using spectroscopy (ThT  $\lambda_{\text{ex}}/\lambda_{\text{em}}$  349 nm/454 nm), with a calibration curve derived via linear regression.  $R^2 = 0.99$ ;  $p < 0.0001$ .

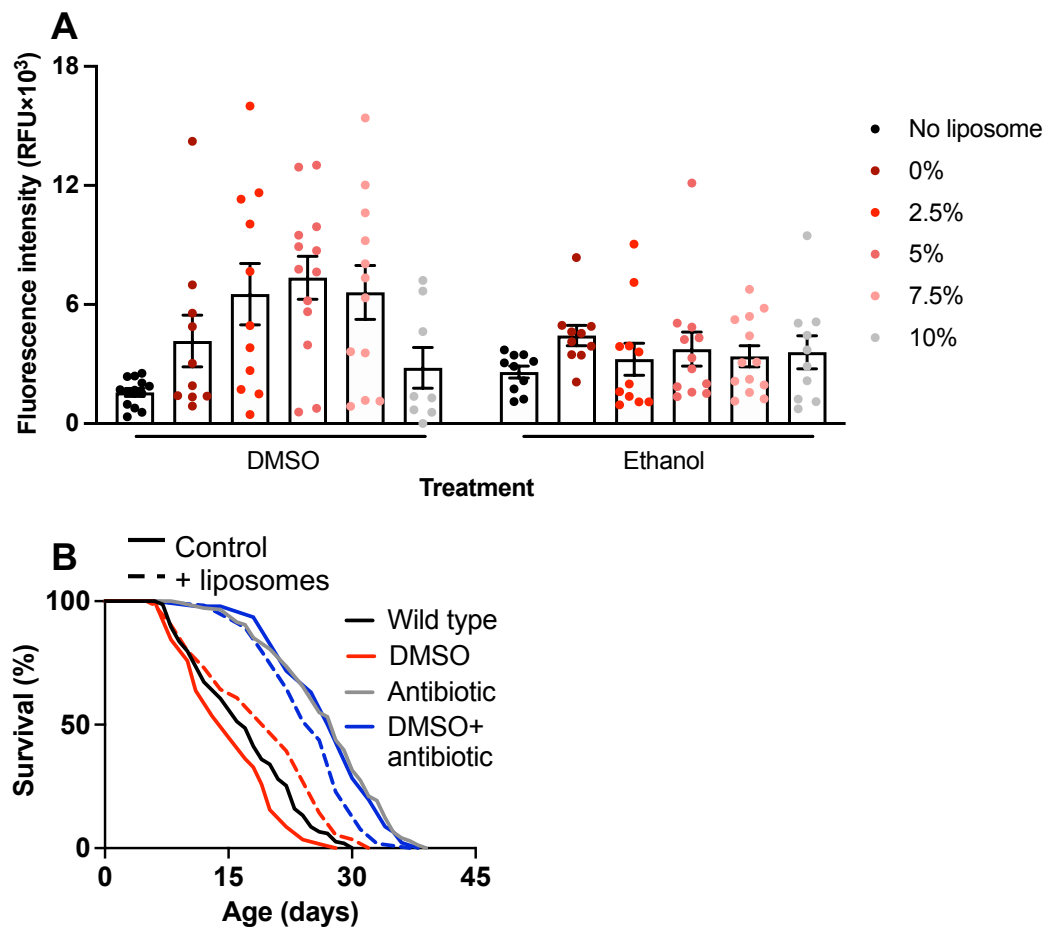

**Figure S10.** Effects of DMSO and ethanol. A, Effects on concentration on liposome-mediated delivery of uranine to *C. elegans*. Mean  $\pm$  S.E.M., by one-way ANOVA (Šidák correction). B, Effects of DMSO on lifespan, and effects on that of liposome encapsulation, and antibiotics (carbenicillin). For statistical details, see Supplemental Table 4.

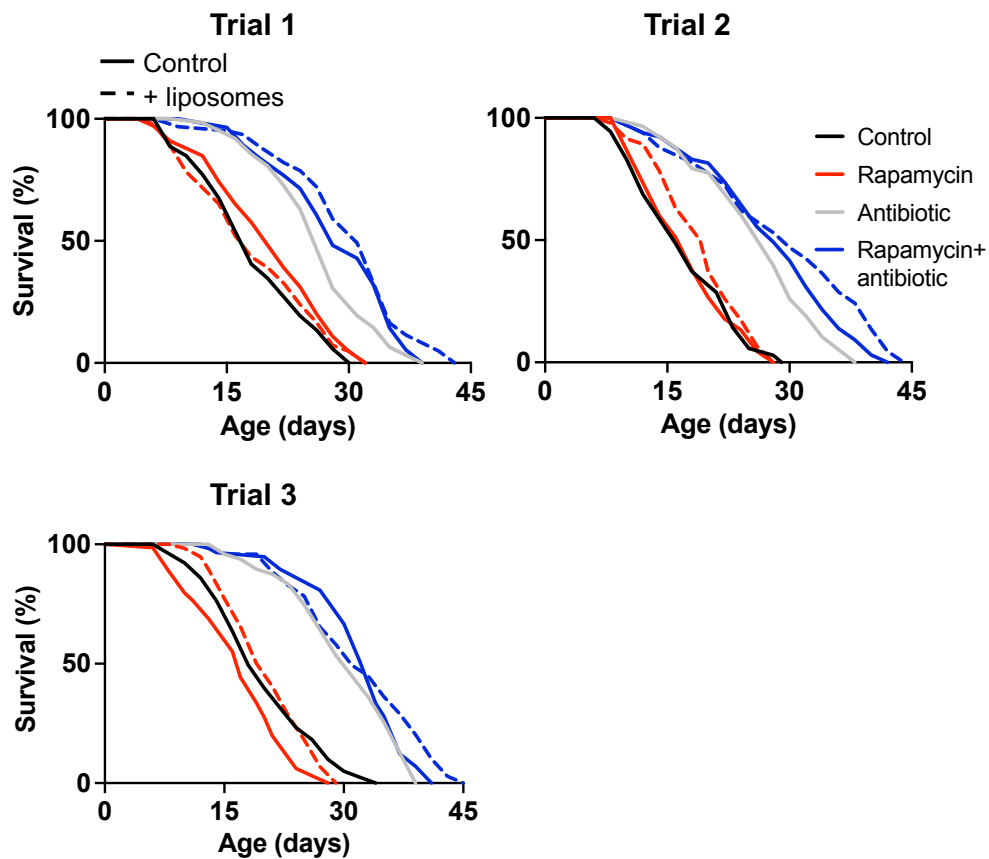

**Figure S11.** Effects of rapamycin on *C. elegans* lifespan (20°C). Free rapamycin alone (100  $\mu$ M) had little effect on lifespan in 3/3 trials, and liposome-encapsulated alone increased lifespan significantly in only 1/3 trials. With carbenicillin, rapamycin (free or liposome encapsulated) increased lifespan in 3/3 trials; Cox proportional hazard analysis,  $p < 0.0001$ . For statistical details, see Supplemental Table 5.

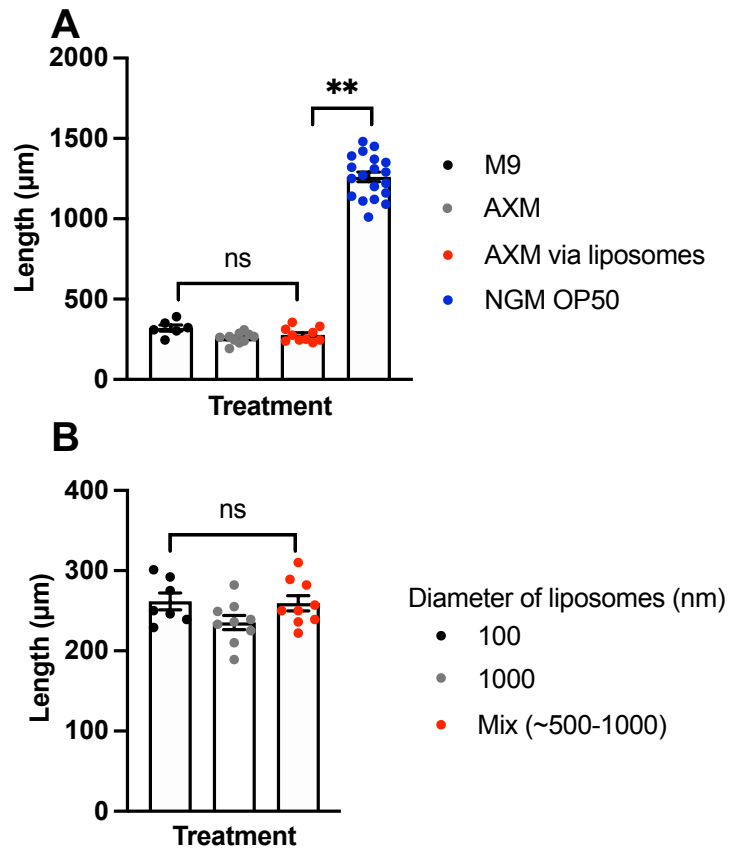

**Figure S12.** No enhancement of larval growth in axenic medium after liposome encapsulation. A, Liposomes of 500 nm diameter. B, Liposomes of different diameters. Mean  $\pm$  S.E.M., by one-way ANOVA (Šidák correction). \*\* $p > 0.01$ .

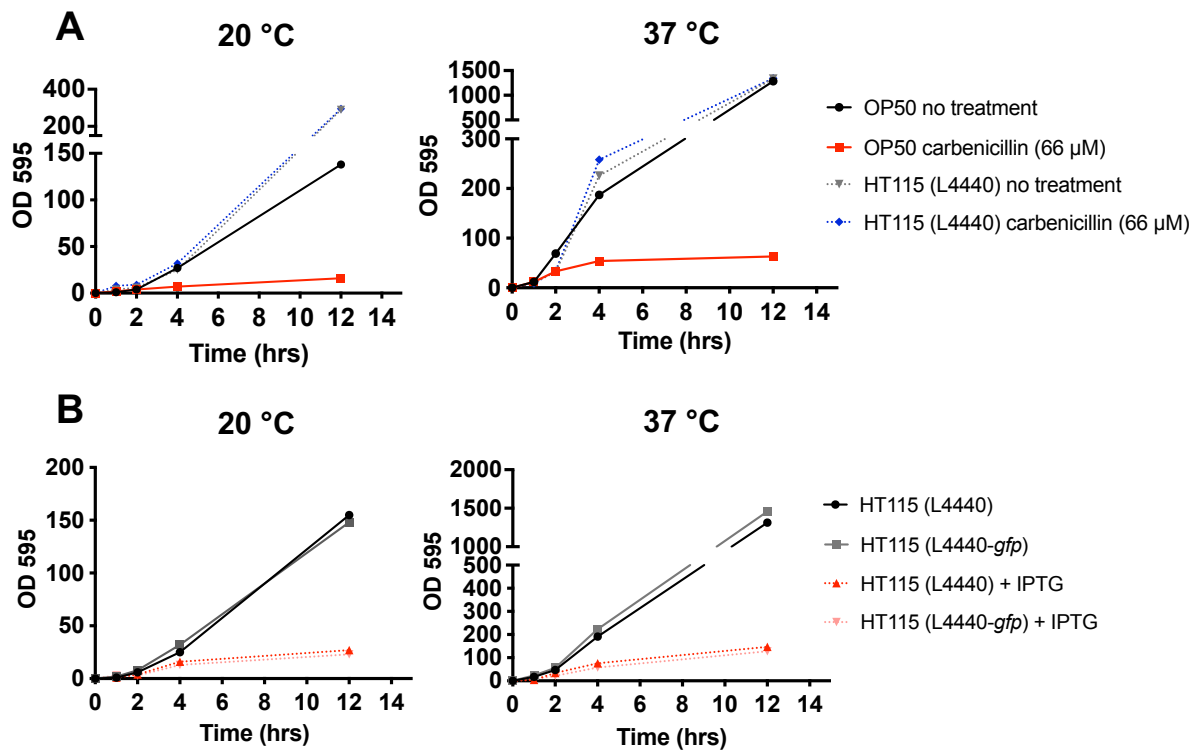

**Figure S13.** *E. coli* HT115 growth in liquid culture is inhibited by IPTG. A, The ampicillin resistance gene on the RNAi plasmid assures normal growth in the presence of carbenicillin. B, IPTG suppresses *E. coli* growth. If bacterial proliferation masks life-extending effects of rapamycin on *C. elegans*, then it is possible that IPTG used in RNAi experiments promotes life extension by rapamycin.

**Supplementary Table 1.** Tests of effects of four compounds on lifespan, with or without liposome encapsulation. C is combined data from all trials.

| Strain/ condition<br>(compound concentration/plate) | Number of deaths/<br>censored                                 | All deaths                                       |                                                      |                                                       |                                                      |                                                         |
|-----------------------------------------------------|---------------------------------------------------------------|--------------------------------------------------|------------------------------------------------------|-------------------------------------------------------|------------------------------------------------------|---------------------------------------------------------|
|                                                     |                                                               | Mean lifespan (days)                             | % change vs. control                                 | p vs. control (log rank)                              | % change vs. no liposomes used                       | p vs. no liposomes used (log rank)                      |
| Control (no drug, no liposomes)                     | [C] 208/41<br>[1] 64/5<br>[2] 51/9<br>[3] 53/7<br>[4] 40/20   | <b>16.75</b><br>15.90<br>16.73<br>17.34<br>17.41 |                                                      |                                                       |                                                      |                                                         |
| GSH 23.4 mM                                         | [C] 203/48<br>[1] 58/6<br>[2] 60/12<br>[3] 50/10<br>[4] 35/20 | <b>16.05</b><br>14.51<br>16.84<br>16.46<br>16.82 | <b>-4.18</b><br>-8.74<br>+0.66<br>-5.07<br>-3.39     | <b>0.42</b><br>0.19<br>0.67<br>0.79<br>0.72           |                                                      |                                                         |
| GSH, liposomes, 23.4 mM                             | [C] 203/39<br>[1] 53/10<br>[2] 54/6<br>[3] 47/13<br>[4] 49/10 | <b>19.75</b><br>18.09<br>18.39<br>20.96<br>21.96 | <b>+17.91</b><br>+13.77<br>+9.92<br>+20.88<br>+26.13 | <b>&lt;0.0001</b><br>0.048<br>0.21<br>0.0002<br>0.011 | <b>+23.05</b><br>+24.67<br>+9.20<br>+27.34<br>+30.56 | <b>&lt;0.0001</b><br>0.0008<br>0.53<br>0.0002<br>0.0059 |
| NAC, 1.2 mM                                         | [C] 164/26<br>[1] 60/10<br>[2] 49/11<br>[3] 55/5              | <b>16.20</b><br>14.54<br>16.39<br>17.91          | <b>-3.28</b><br>-8.55<br>-2.03<br>+3.29              | <b>0.081</b><br>0.098<br>0.57<br>0.63                 |                                                      |                                                         |
| NAC, liposomes, 1.2 mM                              | [C] 175/26<br>[1] 68/4<br>[2] 57/12<br>[3] 55/10              | <b>17.34</b><br>16.49<br>17.66<br>18.04          | <b>+3.52</b><br>+3.71<br>+5.56<br>+4.04              | <b>0.38</b><br>0.57<br>0.24<br>0.90                   | <b>+7.04</b><br>+13.41<br>+7.75<br>+0.73             | <b>0.032</b><br>0.020<br>0.17<br>0.55                   |
| Trimethadione, 11.2 mM                              | [C] 90/26<br>[1] 39/17<br>[2] 51/9                            | <b>16.67</b><br>16.87<br>16.53                   | <b>-0.48</b><br>+6.10<br>-1.19                       | <b>0.48</b><br>0.24<br>0.70                           |                                                      |                                                         |
| Trimethadione, liposomes, 11.2 mM                   | [C] 95/19<br>[1] 49/11<br>[2] 46/8                            | <b>19.90</b><br>20.04<br>19.74                   | <b>+18.81</b><br>+26.04<br>+17.99                    | <b>&lt;0.0001</b><br><0.0001<br>0.0031                | <b>+19.38</b><br>+18.79<br>+19.42                    | <b>0.014</b><br>0.067<br>0.085                          |
| Vitamin C, 27.3 mM                                  | [C] 82/38<br>[1] 38/22<br>[2] 44/16                           | <b>16.13</b><br>16.27<br>15.97                   | <b>-3.70</b><br>+2.33<br>+4.54                       | <b>0.044</b><br>0.047<br>0.14                         |                                                      |                                                         |
| Vitamin C, liposomes, 27.3 mM                       | [C] 104/18<br>[1] 49/10<br>[2] 55/8                           | <b>16.28</b><br>16.50<br>16.07                   | <b>-2.81</b><br>+3.77<br>-3.95                       | <b>0.060</b><br>0.0005<br>0.016                       | <b>+0.93</b><br>+1.41<br>+0.63                       | <b>0.22</b><br>0.31<br>0.32                             |
| Control (carbenicillin 4 mM)                        | [C] 210/33<br>[1] 52/12<br>[2] 52/8<br>[3] 50/8<br>[4] 56/5   | <b>27.38</b><br>28.13<br>26.63<br>29.80<br>25.71 |                                                      |                                                       |                                                      |                                                         |
| GSH 23.4 mM (carbenicillin 4 mM)                    | [C] 213/28<br>[1] 51/9                                        | <b>28.69</b><br>28.96                            | <b>+4.78</b><br>+2.95                                | <b>0.034</b><br>0.14                                  |                                                      |                                                         |

|                                                |                   |              |               |                   |               |               |
|------------------------------------------------|-------------------|--------------|---------------|-------------------|---------------|---------------|
|                                                | [2] 51/9          | 28.41        | +6.68         | 0.10              |               |               |
|                                                | [3] 54/5          | 27.03        | -9.28         | 0.0032            |               |               |
|                                                | [4] 57/5          | 25.20        | -1.98         | 0.93              |               |               |
| GSH, liposomes 23.4 mM<br>(carbenicillin 4 mM) | <b>[C] 199/38</b> | <b>25.52</b> | <b>-6.79</b>  | <b>0.37</b>       | <b>-11.05</b> | <b>0.0052</b> |
|                                                | [1] 42/12         | 25.76        | -8.43         | 0.69              | -11.05        | 0.044         |
|                                                | [2] 48/12         | 25.35        | -4.84         | 0.67              | -10.77        | 0.071         |
|                                                | [3] 45/7          | 25.79        | -9.28         | 0.0032            | -4.59         | 0.32          |
|                                                | [4] 64/7          | 25.76        | -1.98         | 0.93              | +2.22         | 0.87          |
| NAC 1.2 mM<br>(carbenicillin 4 mM)             | <b>[C] 105/19</b> | <b>27.17</b> | <b>-0.77</b>  | <b>0.54</b>       |               |               |
|                                                | [1] 48/12         | 26.92        | -4.30         | 0.92              |               |               |
|                                                | [2] 57/7          | 27.35        | +2.70         | 0.77              |               |               |
| NAC, liposomes 1.2 mM<br>(carbenicillin 4 mM)  | <b>[C] 105/17</b> | <b>23.00</b> | <b>-16.00</b> | <b>&lt;0.0001</b> | <b>-15.35</b> | <b>0.0003</b> |
|                                                | [1] 54/8          | 23.23        | -17.42        | 0.0086            | -13.71        | 0.034         |
|                                                | [2] 51/9          | 22.82        | -14.31        | 0.0041            | -16.56        | 0.0014        |

**Supplementary Table 2.** Deconvolved effects of glutathione on mortality. C is combined data from all trials.

| Strain/<br>condition<br>(compound<br>conc/plate) | Number of<br>deaths/<br>censored    | All deaths                     |                                   |                                          | P deaths                                |                                |                                 |                                          | p deaths                       |                                |                                          |
|--------------------------------------------------|-------------------------------------|--------------------------------|-----------------------------------|------------------------------------------|-----------------------------------------|--------------------------------|---------------------------------|------------------------------------------|--------------------------------|--------------------------------|------------------------------------------|
|                                                  |                                     | Mean<br>lifespan<br>(days)     | %<br>change<br>vs.<br>control     | <i>p</i> vs.<br>control<br>(log<br>rank) | Number<br>/%P of<br>death               | Mean<br>lifespan<br>(days)     | %<br>change<br>vs.<br>control   | <i>p</i> vs.<br>control<br>(log<br>rank) | Mean<br>lifespan<br>(days)     | %<br>change<br>vs.<br>control  | <i>p</i> vs.<br>control<br>(log<br>rank) |
| Control                                          | [C] 93/17<br>[1] 52/6<br>[2] 41/11  | <b>17.73</b><br>18.05<br>17.36 |                                   |                                          | <b>40/43.01</b><br>23/44.23<br>17/41.46 | <b>11.65</b><br>11.91<br>11.29 |                                 |                                          | <b>21.93</b><br>22.41<br>21.36 |                                |                                          |
| GSH 23.4<br>mM                                   | [C] 95/12<br>[1] 44/3<br>[2] 51/9   | <b>17.76</b><br>17.31<br>18.10 | <b>+0.06</b><br>-4.10<br>+4.26    | <b>0.91</b><br>0.65<br>0.36              | <b>33/34.74</b><br>17/38.64<br>16/31.37 | <b>11.27</b><br>10.71<br>11.88 | <b>-3.26</b><br>-10.00<br>+5.26 | <b>0.59</b><br>0.26<br>0.39              | <b>20.97</b><br>21.41<br>20.63 | <b>-4.37</b><br>-4.46<br>-3.42 | <b>0.63</b><br>0.64<br>0.94              |
| GSH<br>liposomes<br>23.4 mM                      | [C] 103/16<br>[1] 51/6<br>[2] 52/10 | <b>19.65</b><br>20.09<br>19.20 | <b>+10.83</b><br>+15.79<br>+10.60 | <b>0.023</b><br>0.13<br>0.036            | <b>25/24.27</b><br>13/25.49<br>12/23.08 | <b>12.80</b><br>12.92<br>12.67 | <b>+9.87</b><br>+8.48<br>+12.22 | <b>0.18</b><br>0.54<br>0.11              | <b>21.56</b><br>22.46<br>20.70 | <b>-1.68</b><br>-0.03<br>-3.09 | <b>0.49</b><br>0.53<br>0.50              |

**Supplementary Table 3.** Mortality deconvolution analysis of effects of ThT. C is combined data from all trials.

| Strain/<br>condition<br>(compound<br>concentration/<br>plate) | Number of<br>deaths/<br>censored                   | All deaths                              |                                             |                                                | P deaths                                            |                                         |                                             |                                               | p deaths                                |                                            |                                          |
|---------------------------------------------------------------|----------------------------------------------------|-----------------------------------------|---------------------------------------------|------------------------------------------------|-----------------------------------------------------|-----------------------------------------|---------------------------------------------|-----------------------------------------------|-----------------------------------------|--------------------------------------------|------------------------------------------|
|                                                               |                                                    | Mean<br>lifespan<br>(days)              | %<br>change<br>vs.<br>control               | <i>p</i> vs.<br>control<br>(log<br>rank)       | Number<br>/%P of<br>death                           | Mean<br>lifespan<br>(days)              | %<br>change<br>vs.<br>control               | <i>p</i> vs.<br>control<br>(log<br>rank)      | Mean<br>lifespan<br>(days)              | %<br>change<br>vs.<br>control              | <i>p</i> vs.<br>control<br>(log<br>rank) |
| Control                                                       | [C] 148/32<br>[1] 49/10<br>[2] 48/12<br>[3] 51/10  | <b>15.89</b><br>15.54<br>15.55<br>16.57 |                                             |                                                | <b>66/44.59</b><br>20/40.82<br>23/47.92<br>23/45.10 | <b>13.09</b><br>12.40<br>12.78<br>14.00 |                                             |                                               | <b>17.88</b><br>17.59<br>17.36<br>18.64 |                                            |                                          |
| ThT 25 µM                                                     | [C] 148/115<br>[1] 48/40<br>[2] 49/37<br>[3] 51/38 | <b>17.88</b><br>18.16<br>17.62<br>17.87 | <b>+12.52</b><br>+16.86<br>+13.31<br>+7.84  | <b>0.0023</b><br>0.019<br>0.099<br>0.20        | <b>58/39.19</b><br>19/39.58<br>20/40.82<br>19/37.25 | <b>16.28</b><br>16.32<br>15.70<br>17.87 | <b>+24.37</b><br>+31.61<br>+22.85<br>+26.64 | <b>&lt;0.0001</b><br>0.0064<br>0.011<br>0.038 | <b>18.76</b><br>18.97<br>18.90<br>18.44 | <b>+4.92</b><br>+7.85<br>+8.87<br>-1.07    | <b>0.17</b><br>0.22<br>0.36<br>0.80      |
| ThT liposomes<br>25 µM                                        | [C] 93/111<br>[1] 26/35<br>[2] 34/32<br>[3] 33/44  | <b>19.10</b><br>19.25<br>19.19<br>18.85 | <b>+20.20</b><br>+23.87<br>+23.41<br>+13.76 | <b>&lt;0.0001</b><br>0.0080<br>0.0078<br>0.068 | <b>29/31.18</b><br>8/30.78<br>10/29.41<br>11/33.33  | <b>16.90</b><br>17.50<br>15.80<br>18.85 | <b>+29.11</b><br>+41.13<br>+23.63<br>+34.64 | <b>0.0002</b><br>0.011<br>0.027<br>0.046      | <b>20.00</b><br>19.89<br>20.50<br>19.55 | <b>+11.86</b><br>+13.08<br>+18.09<br>+4.88 | <b>0.020</b><br>0.17<br>0.054<br>0.37    |
| Control<br>(carbenicillin 4<br>mM)                            | [C] 169/9<br>[1] 56/4<br>[2] 56/3<br>[3] 57/2      | <b>23.53</b><br>23.61<br>23.50<br>23.47 |                                             |                                                |                                                     |                                         |                                             |                                               |                                         |                                            |                                          |
| ThT 25 µM<br>(carbenicillin 4<br>mM)                          | [C] 119/108<br>[1] 37/43<br>[2] 38/37<br>[3] 44/28 | <b>23.41</b><br>23.46<br>22.53<br>22.05 | <b>-0.51</b><br>-0.64<br>-4.12<br>-6.05     | <b>0.88</b><br>0.77<br>0.68<br>0.19            |                                                     |                                         |                                             |                                               |                                         |                                            |                                          |

|                                                        |                    |              |              |              |  |  |  |  |  |  |  |
|--------------------------------------------------------|--------------------|--------------|--------------|--------------|--|--|--|--|--|--|--|
| ThT liposomes<br>25 $\mu$ M<br>(carbenicillin 4<br>mM) | <b>[C] 113/129</b> | <b>22.14</b> | <b>-5.91</b> | <b>0.056</b> |  |  |  |  |  |  |  |
|                                                        | [1] 35/47          | 23.37        | -1.02        | 0.88         |  |  |  |  |  |  |  |
|                                                        | [2] 34/40          | 20.71        | -11.87       | 0.056        |  |  |  |  |  |  |  |
|                                                        | [3] 44/42          | 22.27        | -5.11        | 0.21         |  |  |  |  |  |  |  |

**Supplementary Table 4.** Effects of DMSO on lifespan. C is combined data from all trials.

| Strain/ condition<br>(compound<br>concentration/<br>plate) | Number of<br>deaths/<br>censored     | All deaths                     |                                 |                                       |
|------------------------------------------------------------|--------------------------------------|--------------------------------|---------------------------------|---------------------------------------|
|                                                            |                                      | Mean<br>lifespan<br>(days)     | % change<br>vs. control         | <i>p</i> vs.<br>control<br>(log rank) |
| Control                                                    | [C] 117/12<br>[1] 55/6<br>[2] 62/6   | <b>16.81</b><br>16.67<br>18.48 |                                 |                                       |
| Lipid                                                      | [C] 115/12<br>[1] 54/9<br>[2] 61/3   | <b>16.31</b><br>17.11<br>16.28 | <b>-2.97</b><br>+2.64<br>-13.56 | <b>0.31</b><br>0.070<br>0.45          |
| Liposomes                                                  | [C] 108/12<br>[1] 55/5<br>[2] 53/7   | <b>16.11</b><br>16.87<br>15.28 | <b>-4.16</b><br>+1.20<br>-17.31 | <b>0.061</b><br>0.18<br>0.046         |
| 5% DMSO                                                    | [C] 103/11<br>[1] 45/5<br>[2] 58/6   | <b>15.89</b><br>15.22<br>17.71 | <b>-5.47</b><br>-8.70<br>-4.17  | <b>0.08</b><br>0.33<br>0.45           |
| 5% DMSO<br>liposomes                                       | [C] 118/18<br>[1] 57/12<br>[2] 61/6  | <b>16.33</b><br>19.13<br>16.65 | <b>-2.86</b><br>+14.76<br>-9.90 | <b>0.092</b><br>0.39<br>0.78          |
| Control<br>(carbenicillin 4<br>mM)                         | [C] 115/12<br>[1] 52/8<br>[2] 63/4   | <b>27.68</b><br>27.91<br>26.63 |                                 |                                       |
| Liposomes<br>(carbenicillin 4<br>mM)                       | [C] 111/20<br>[1] 52/10<br>[2] 59/10 | <b>27.15</b><br>26.88<br>27.65 | <b>-1.91</b><br>-3.69<br>+3.83  | <b>0.093</b><br>0.60<br>0.50          |
| 5% DMSO<br>(carbenicillin 4<br>mM)                         | [C] 101/14<br>[1] 46/9<br>[2] 55/5   | <b>27.45</b><br>28.55<br>26.71 | <b>-0.83</b><br>+2.29<br>+0.30  | <b>0.053</b><br>0.73<br>0.97          |
| 5% DMSO<br>liposomes<br>(carbenicillin 4<br>mM)            | [C] 94//16<br>[1] 53/7<br>[2] 41/9   | <b>25.10</b><br>24.08<br>26.98 | <b>-9.32</b><br>-13.72<br>+1.31 | <b>0.059</b><br>0.097<br>0.85         |

**Supplementary Table 5.** Effects of rapamycin ± antibiotics on lifespan. C, combined data from all trials.

| Strain/<br>condition<br>(compound<br>concentration/<br>plate) | Number<br>of deaths/<br>censored                 | All deaths                              |                                           |                                                          |                                                                                  | P deaths                                            |                                         |                                          |                                      | p deaths                                |                                           |                                         |
|---------------------------------------------------------------|--------------------------------------------------|-----------------------------------------|-------------------------------------------|----------------------------------------------------------|----------------------------------------------------------------------------------|-----------------------------------------------------|-----------------------------------------|------------------------------------------|--------------------------------------|-----------------------------------------|-------------------------------------------|-----------------------------------------|
|                                                               |                                                  | Mean<br>lifespan<br>(days)              | %<br>change<br>vs.<br>control             | p vs.<br>control<br>(log<br>rank)                        | Cox PH<br>Prob>C<br>hisq                                                         | Number<br>/%P of<br>death                           | Mean<br>lifespan<br>(days)              | %<br>change<br>vs.<br>control            | p vs.<br>control<br>(log<br>rank)    | Mean<br>lifespan<br>(days)              | %<br>change<br>vs.<br>control             | p vs.<br>control<br>(log<br>rank)       |
| Control                                                       | [C] 151/21<br>[1] 52/7<br>[2] 35/9<br>[3] 64/5   | <b>17.90</b><br>18.26<br>17.44<br>15.90 |                                           |                                                          |                                                                                  | <b>65/43.05</b><br>20/38.46<br>17/48.57<br>28/43.75 | <b>15.71</b><br>14.87<br>16.13<br>15.93 |                                          |                                      | <b>22.70</b><br>22.47<br>23.03<br>22.63 |                                           |                                         |
| Rapamycin<br>100 µM                                           | [C] 176/21<br>[1] 65/4<br>[2] 45/10<br>[3] 66/7  | <b>18.99</b><br>20.30<br>17.42<br>16.79 | <b>+6.09</b><br>+11.17<br>-0.11<br>+5.60  | <b>0.077</b><br>0.080<br>0.86<br>0.54                    |                                                                                  | <b>78/44.32</b><br>28/43.07<br>20/44.44<br>30/45.45 | <b>16.34</b><br>16.55<br>16.75<br>15.76 | <b>+4.01</b><br>+11.30<br>+3.84<br>-1.07 | <b>0.26</b><br>0.036<br>0.49<br>0.81 | <b>23.09</b><br>23.40<br>23.75<br>22.10 | <b>+1.72</b><br>+4.14<br>+3.13<br>-2.34   | <b>0.35</b><br>0.40<br>0.61<br>0.86     |
| Rapamycin<br>0.5 µM<br>liposomes                              | [C] 159/31<br>[1] 45/7<br>[2] 46/11<br>[3] 68/13 | <b>19.43</b><br>18.45<br>19.19<br>18.50 | <b>+8.58</b><br>+1.04<br>+10.03<br>+16.35 | <b>0.056</b><br>0.60<br>0.34<br>0.029                    |                                                                                  | <b>59/37.11</b><br>14/31.11<br>16/34.78<br>29/42.64 | <b>16.70</b><br>16.55<br>16.75<br>16.75 | <b>+6.30</b><br>+11.30<br>+3.84<br>+5.14 | <b>0.18</b><br>0.047<br>0.79<br>0.36 | <b>24.78</b><br>24.88<br>24.76<br>25.33 | <b>+9.16</b><br>+10.73<br>+7.51<br>+11.93 | <b>0.0026</b><br>0.041<br>0.15<br>0.025 |
| Control<br>(carbenicillin 4<br>mM)                            | [C] 172/29<br>[1] 62/4<br>[2] 58/13<br>[3] 52/12 | <b>26.96</b><br>26.54<br>26.34<br>28.13 |                                           |                                                          |                                                                                  |                                                     |                                         |                                          |                                      |                                         |                                           |                                         |
| Rapamycin<br>100 µM<br>(carbenicillin 4<br>mM)                | [C] 178/21<br>[1] 56/5<br>[2] 65/9<br>[3] 57/7   | <b>29.60</b><br>28.75<br>28.03<br>32.21 | <b>+9.79</b><br>+8.33<br>+6.42<br>+14.50  | <b>&lt;0.0001</b><br>0.038<br>0.048<br><b>&lt;0.0001</b> | <b>&lt;0.0001</b><br><b>&lt;0.0001</b><br><b>&lt;0.0001</b><br><b>&lt;0.0001</b> |                                                     |                                         |                                          |                                      |                                         |                                           |                                         |
| Rapamycin                                                     | [C] 196/28                                       | <b>30.04</b>                            | <b>+11.42</b>                             | <b>&lt;0.0001</b>                                        | <b>&lt;0.0001</b>                                                                |                                                     |                                         |                                          |                                      |                                         |                                           |                                         |

|                                                     |           |       |        |        |         |  |  |  |  |  |  |  |
|-----------------------------------------------------|-----------|-------|--------|--------|---------|--|--|--|--|--|--|--|
| liposomes<br>0.5 $\mu$ M<br>(carbenicillin 4<br>mM) | [1] 61/2  | 30.13 | +13.53 | 0.0007 | <0.0001 |  |  |  |  |  |  |  |
|                                                     | [2] 66/12 | 29.36 | +11.47 | 0.0009 | <0.0001 |  |  |  |  |  |  |  |
|                                                     | [3] 69/14 | 30.08 | +11.57 | 0.0001 | <0.0001 |  |  |  |  |  |  |  |
